# Supplementary material for: Illumina TruSeq Synthetic Long-Reads Empower De Novo Assembly and Resolve Complex, Highly-Repetitive Transposable Elements
Source: PubMed Central journal article supplement (PMC4154752; doi:10.1371/journal.pone.0106689), 2014-09-04
Supplement: pone.0106689.s001.pdf [file pone.0106689.s001.pdf]

# 1 Illumina TruSeq synthetic long-reads empower *de novo* assembly 2 and resolve complex, highly-repetitive transposable elements

Rajiv C. McCoy<sup>1</sup>, Ryan W. Taylor<sup>1</sup>, Timothy A. Blauwkamp<sup>2</sup>, Joanna L. Kelley<sup>3</sup>, Michael Kertesz<sup>4</sup>,  
Dmitry Pushkarev<sup>5</sup>, Dmitri A. Petrov\*<sup>1</sup> and Anna-Sophie Fiston-Lavier\*<sup>1,6</sup>

<sup>1</sup>Department of Biology, Stanford University, Stanford, California 94305, USA

<sup>2</sup>Illumina Inc., Hayward, California 94545, USA

<sup>3</sup>School of Biological Sciences, Washington State University, Pullman, Washington 99164, USA

<sup>4</sup>Department of Bioengineering, Stanford University, Stanford, California 94035, USA

<sup>5</sup>Department of Physics, Stanford University, Stanford, California 94035, USA

<sup>6</sup>Institut des Sciences de l'Evolution-Montpellier, Montpellier, Cedex 5, France

Corresponding author: Rajiv C. McCoy rmccoy@stanford.edu

\*DAP and ASFL are joint senior authors on this work.

## 1 Supplemental Materials

### 2 Generation of TruSeq<sup>TM</sup> synthetic long-reads from short read data

#### 3 Short Read Pre-Processing

4 Prior to the assembly of the synthetic long-reads, the short reads in every well are pre-filtered to correct for  
5 errors which could lead to mis-assemblies. Reads that do not have a sufficient stretch of high-quality bases are  
6 filtered. Low-quality ends of remaining bases are trimmed (hard-clipped). Read pairs that appear to 'read  
7 through' one another, and thus potentially contain adapter sequence on the 3' end(s) of one or both reads,  
8 are modified as follows. The first read is trimmed of bases that appear to extend beyond the second read,  
9 and the second read is discarded, resulting in an unpaired read that should have had any 3' adapter sequence  
10 clipped off. If the trimmed reads in a pair are shorter than 30 bp, the pair is discarded. If one read in a pair  
11 is shorter than 30 bp, and the second read longer than 50 bp, the longer read is kept. Adapter sequences are  
12 removed and the end-marker sequences identified and trimmed, and reads containing end-marker sequences  
13 are tagged for downstream use in the pipeline.

#### 14 Assembly of Contigs

15 The assembly module consists of several steps: digital normalization, read error correction, graph construc-  
16 tion, and clean-up using paired-end reads. These steps are described in more detail in the following sections.

#### 17 Digital Normalization

18 Due to bias introduced during PCR, the read coverage among input fragments in the sample can vary greatly.  
19 In order to normalize coverage variation across fragments (which improves the accuracy of the assembly as well

20 as the computational performance of the algorithm), digital normalization methods are used [1]. The digital  
21 normalization process smooths out highly-biased sequence coverage by removing specific over-represented  
22 sequences. Coverage is normalized such that the highest-coverage fragments are approximately  $40\times$ .

### 23 **Error Correction**

24 Following digital normalization, an error correction step is performed using an overlap-based method. The  
25 aim of this step is to correct PCR and sequencing artifacts which introduce false base substitutions or indels.  
26 At a high level, it operates as follows. An index of all k-mers of length 31 in the reads is constructed (the  
27 k-mer hash). For each read, k-mers in the read are compared to the index to find the set of reads which share  
28 the same k-mer. Matches to candidate overlapping reads are extended using semi-banded global alignment,  
29 and those which have a match length of at least 31 bases and share 95% identity are retained. Multiple  
30 sequence alignment (MSA) of the set of overlapping reads is performed. Using both the base quality scores  
31 of the reads and the results of the MSA, a consensus sequence for the read is generated.

### 32 **Graph Construction**

33 The main assembly step is performed using the String Graph Assembler (SGA) [2], which is an overlap-based  
34 assembly method. In the first stage, SGA uses a k-mer overlap size of 31 to create a graph with reads as  
35 vertices and k-mer overlaps as edges.

36 After the construction of an initial graph, the next step of the algorithm is to clean the graph and remove  
37 spurious edges using several heuristics. The algorithm requires that paths in the graph are supported by  
38 paired-end reads. It checks for the existence of a path linking the two reads of a read pair within the expected  
39 insert size distribution (500 bp, by default). Any edges in the graph which do not support read pairs are  
40 removed. In addition, tips and bubbles in the read graph, which normally occur during *de novo* assembly,  
41 are cleaned up using standard graph-cleaning methods.

### 42 **Scaffolding Contigs to Assemble Long Reads**

43 The next stage in the pipeline is scaffolding, the goal of which is to use paired-end information to place and  
44 orient the contigs generated in the previous step and fill in gaps between contigs. The method employed in  
45 the long reads pipeline is based on the scaffolding method used in the original SGA assembler, and the user  
46 is referred to the original paper for further details [2].

47 In brief, scaffolding is accomplished by re-aligning the input short reads to the contigs using BWA aligner

48 [3], and using the paired-end alignments to infer scaffold structure. The link between two contigs is made  
49 when two or more paired reads map such that read 1 from a read pair maps to one contig and read 2 from  
50 the same read pair maps to the other. The orientation of the contigs relative to one another is also inferred  
51 from the orientation of the read pairs. In addition, the end-marker sequences are used to help guide and  
52 constrain the construction of our scaffold graph

### 53 **Gap Filling**

54 The next step of this module is to fill in scaffold gaps where possible in order to resolve repeats. In this  
55 step, we use the input short reads, making use of the FM index computed during the contig assembly. We  
56 begin by finding the highest-scoring read which matches the end of one of the contigs, and continue to chain  
57 together reads iteratively. If a chain is found that overlaps another contig in the same scaffold, the consensus  
58 is retained and the gap filled with this sequence.

### 59 **Assembly QC and Correction**

60 The final stage of the analysis pipeline involves verification of the scaffolds and error correction. The short  
61 read data is again aligned against the scaffolds generated in the previous step using BWA aligner [3]. Based  
62 on the alignments, the scaffolds are corrected for single-nucleotide errors and broken into smaller scaffolds  
63 should there be only partial alignment support. Quality scores for the final long reads are also estimated  
64 from the alignments.

### 65 **Breaking Scaffolds**

66 The short reads used during the synthetic long-read assembly are aligned to the scaffolds. The alignments are  
67 searched for read pairs in which one read aligns and the other one does not. Unaligned reads are re-aligned,  
68 and reads that are overlapping or running into scaffold gaps are counted and computed. In order to determine  
69 whether or not to break a scaffold gap, Illumina computes the following formula:

$$\begin{aligned} & \text{sqrt}(0.3+(\text{reads aligning to mid point of gap on fwd strand})*0.3+ \\ & (\text{reads aligning to mid point of gap on rev strand}))/(\text{total} \\ & \text{number of reads in gap}) \end{aligned}$$

73 If this ratio is smaller than 0.1, the gap is left as is. If it is larger, the scaffold is broken at this gap. If  
74 there are only few reads or none, the scaffold for the region is left as is.

## 75 Q-scores

76 From the alignments of short reads to the scaffolds, a pileup file is generated which provides the base quality  
77 scores of the aligned reads at each position in a scaffold. The quality score at each scaffold position is then  
78 estimated from the read base qualities as follows:

- 79 • Remove ‘N’s and indels from the pileup.
- 80 • If coverage  $> 5\times$  and all nucleotides at this position agree, set Q-score to max of pileup.
- 81 • If  $< 5\%$  mismatches or  $> 3$  matches, set Q-score to mean of pileup.
- 82 • If all of the above steps fail, look at the most frequently-occurring nucleotide in the pileup as well as  
83 the second most frequent nucleotide. Compute the posterior probability of most frequent base given  
84 the quality scores. This includes some correction factors from a PCR error rate model. Do the same  
85 for the second most frequent nucleotide. Choose the nucleotide with the highest posterior probability  
86 and compute the Q-score from this probability.

## 87 Pre-assembly quality control

### 88 Assessment of contamination

89 We assessed the degree of contamination with BLASTN [4] by searching against the NCBI nucleotide database  
90 (see Methods). The degree of contamination in the TruSeq synthetic long-read libraries was low, with 99.8%  
91 (953,797) of reads having top hits to *D. melanogaster* reference sequences. We note that the number of  
92 synthetic long-reads with top BLASTN hits to *D. melanogaster* is lower than the number that map to the  
93 reference genome with BWA-MEM for several reasons. First, a small number of reads derived from regions of  
94 extremely low divergence erroneously map to other *Drosophila* species. Second, the “Uextra” scaffolds likely  
95 contain some contamination from other species as described in the release notes: <http://www.fruitfly.org/data/sequence/README.RELEASE5>. Finally, for a very small number of reads, large proportions of the  
96 reads lengths are clipped by BWA-MEM with only small subsequences that align. Based on the BLASTN  
97 results, the most abundant contaminant reads had top matches to known symbionts of *D. melanogaster*,  
98 including acetic acid bacteria from the genera *Gluconacetobacter*, *Gluconobacter*, and *Acetobacter* (Table S2  
99 in Supporting File S1). Because contamination was extremely rare and because we could not exclude that  
100 sequences with no BLAST hits may correspond to fly-derived sequences not previously assembled in the  
101 reference genome, we included all sequences in downstream analyses.  
102

## 103 **Genome assembly from TruSeq synthetic long-reads**

### 104 **Assembly with the Celera Assembler**

105 The following Celera Assembler parameters are roughly based on those recommended for PacBio consensus-  
106 corrected reads: [http://sourceforge.net/apps/mediawiki/wgs-assembler/index.php?title=PBcR#Assembly\\_](http://sourceforge.net/apps/mediawiki/wgs-assembler/index.php?title=PBcR#Assembly_of_Corrected_Sequences)  
107 [of\\_Corrected\\_Sequences](http://sourceforge.net/apps/mediawiki/wgs-assembler/index.php?title=PBcR#Assembly_of_Corrected_Sequences). Based on our goal of assembling separate copies of TEs, however, we elected to  
108 use a greater k-mer size and k-mer threshold to increase specificity and reduce the number of false joins  
109 (which could generate chimeric sequences).

```
110 unitigger=bogart
111 merSize=31
112 merThreshold=auto*2
113 ovlMinLen=800
114 obtErrorRate=0.03
115 obtErrorLimit=4.5
116 ovlErrorRate=0.03
117 utgErrorRate=0.015
118 utgGraphErrorRate=0.015
119 utgGraphErrorLimit=0
120 utgMergeErrorRate=0.03
121 utgMergeErrorLimit=0
```

122 The bogart unitigger, which is recommended for Illumina data or Illumina data in combination with other  
123 data types, and is also employed in the PacBio corrected read assembly pipeline. We required overlap of  
124 at least 800 bp in order to merge across reads, a parameter that further increases overlap specificity. Error  
125 rates are set substantially lower than the default options, given the low observed rate of mismatches to the  
126 reference genome in the TruSeq synthetic long reads as well as the fact that we sequenced a highly inbred  
127 strain of *D. melanogaster*. These parameters are intentionally conservative to avoid the erroneous merging of  
128 contigs at identical repeats. Modifications to these parameters may increase overlap sensitivity and achieve  
129 greater contig lengths, but likely at the expense of mis-assembly. Assembly for species with higher rates of  
130 polymorphism would require error rates to be set higher to avoid separate assembly of individual haplotypes.

## 131 **Contig merging with Minimus2**

132 NUCmer [5, 6] alignment to the reference genome revealed that in some cases, the Celera Assembler produced  
133 contigs with ends with long stretches (>1 Kbp) of perfect sequence identity. As we demonstrated in the main  
134 text, many of these cases represent regions of low coverage in synthetic long reads, where data were insufficient  
135 to support a join. We therefore used the simple overlap-based assembler Minimus2 to generate supercontigs  
136 from the contigs output by Celera. The parameters used for this assembly were:

```
137 REFCOUNT= 0  
138 MINID    = 99.9  
139 OVERLAP  = 800  
140 MAXTRIM = 1000  
141 WIGGLE   = 15  
142 CONSERR  = 0.01
```

143 The parameter REFCOUNT=0 means that the assembler performs all vs. all alignment of the contigs,  
144 rather than merging two separate assemblies (a common application of Minimus2). We required a stringent  
145 sequence identity of 99.9% with at least 800 bp of overlap at the contig ends to allow a join, thereby avoiding  
146 false contig joins.

## 147 **Assembly assessment with NUCmer alignment**

148 Alignment of assembled contigs to the high quality reference genome was performed with NUCmer (version  
149 3.23) [5, 6], and the resulting alignment file was filtered according to guidelines described in the documenta-  
150 tion: <http://mummer.sourceforge.net/manual/#mappingdraft>.

```
151 nucmer ref.fasta qry.fasta  
152  
153 delta-filter -q out.delta > out.q.delta
```

154 We required alignments to have at least 99% identity to the reference for at least 1000 bp.

```
155 show-coords -THrcl out.q.delta | \  
156 awk '{if ($7>99 && $5>1000) print $12"\t"$1"\t"$2"\t"$13"\t"$11}' > nucmer.bed
```

157 We then used BEDTools (version 2.19.1) [7] to merge across perfectly adjacent or partially overlapping  
158 alignments.

```
159 bedtools merge -i nucmer.bed > nucmer.merge.bed
```

160 Alignment statistics reported in Table 2 were then produced as follows:

```
161
```

```
162 for i in X 2L 2R 3L 3R 4 XHet 2LHet 2RHet 3LHet 3RHet YHet M U
```

```
163 do
```

```
164     echo $i
```

```
165     # count the alignments
```

```
166     cat nucmer.bed | awk -v i=$i '{if ($1==i) print}' | cut -f4 | sort | uniq | wc -l
```

```
167
```

```
168     # count the gaps
```

```
169     bedtools complement -g reference.genome -i nucmer.merge.bed > nucmer.complement.bed
```

```
170     cat nucmer.complement.bed | awk -v i=$i '{if ($1==i) print}' | wc -l
```

```
171
```

```
172     # sum the total aligned length
```

```
173     cat nucmer.merge.bed | awk -v i=$i '{if ($1==i) print $3-$2}' | \
```

```
174         awk '{sum+=$1} END {print sum}'
```

```
175     printf "\n\n"
```

```
176 done
```

```
177
```

178 The same alignment file (.delta) is also analyzed to define the search space for TEs and genes: [https:](https://github.com/rmccoy7541/assess-assembly)

179 [//github.com/rmccoy7541/assess-assembly](https://github.com/rmccoy7541/assess-assembly). The steps in the pipeline are as follows:

- 180 ● Map contigs to the reference genome with NUCmer, extracting only the optimal mapping of each contig  
181 to one position in the reference.
- 182 ● Check whether both the start and end boundary of the gene or TE fall within the same aligned contig.
- 183 ● If so, perform local alignment between the reference sequence of the gene or TE and the corresponding  
184 aligned sequence.
- 185 ● Calculate the percent identity and the proportion of the gene or TE's length that was assembled and  
186 aligned.

187 Supplemental Figures

Figure 1: Diagram of the TruSeq synthetic long-read library preparation protocol.

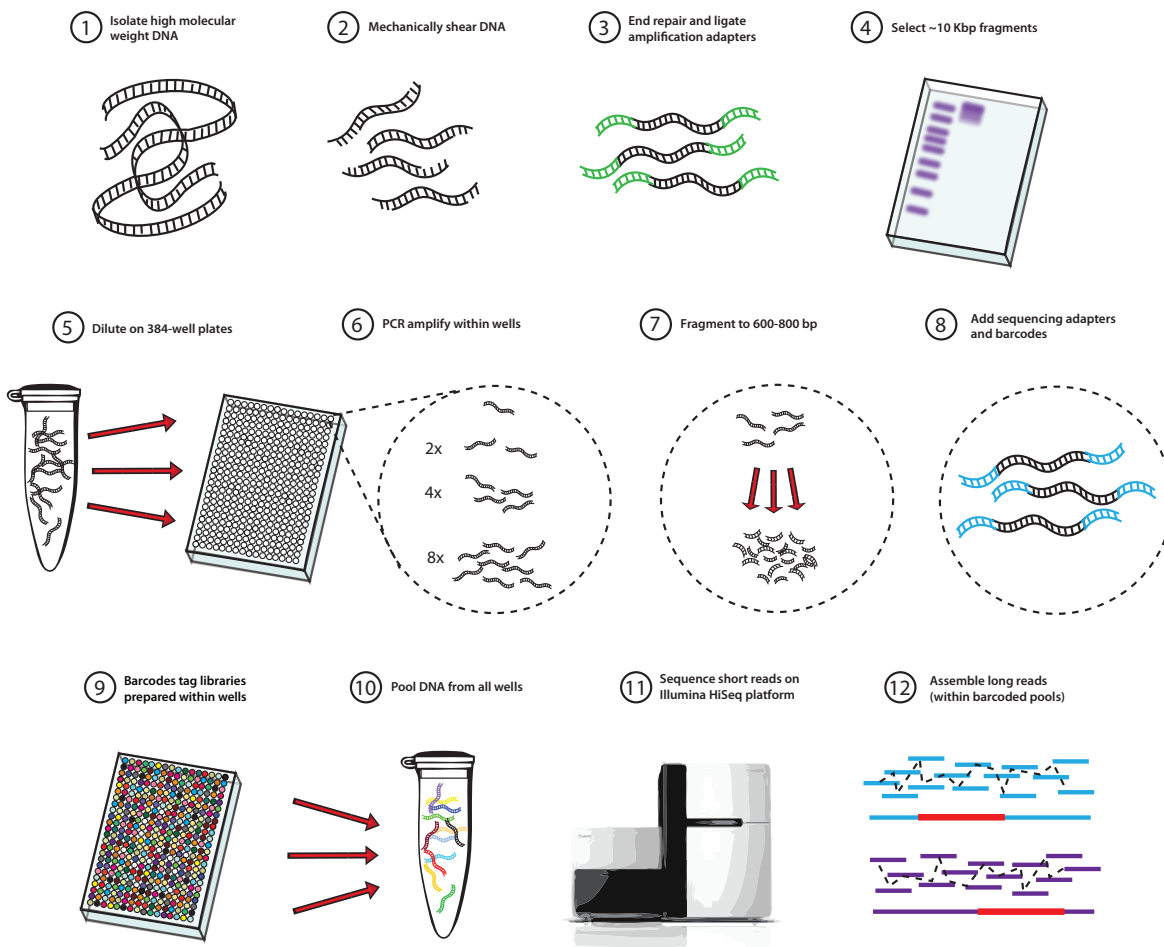



Figure 2: Dot plots depicting NUCmer [5] alignment between assembled contigs and the reference genome. Segments off of the diagonal represent various classes of mis-assembly (insertions, deletions, or translocations with respect to the reference sequence). Red segments represent forward alignments, while blue segments indicate an inversion with respect to the rest of the contig alignment. Dot plots were generated using the mummerplot feature of MUMmer [6]

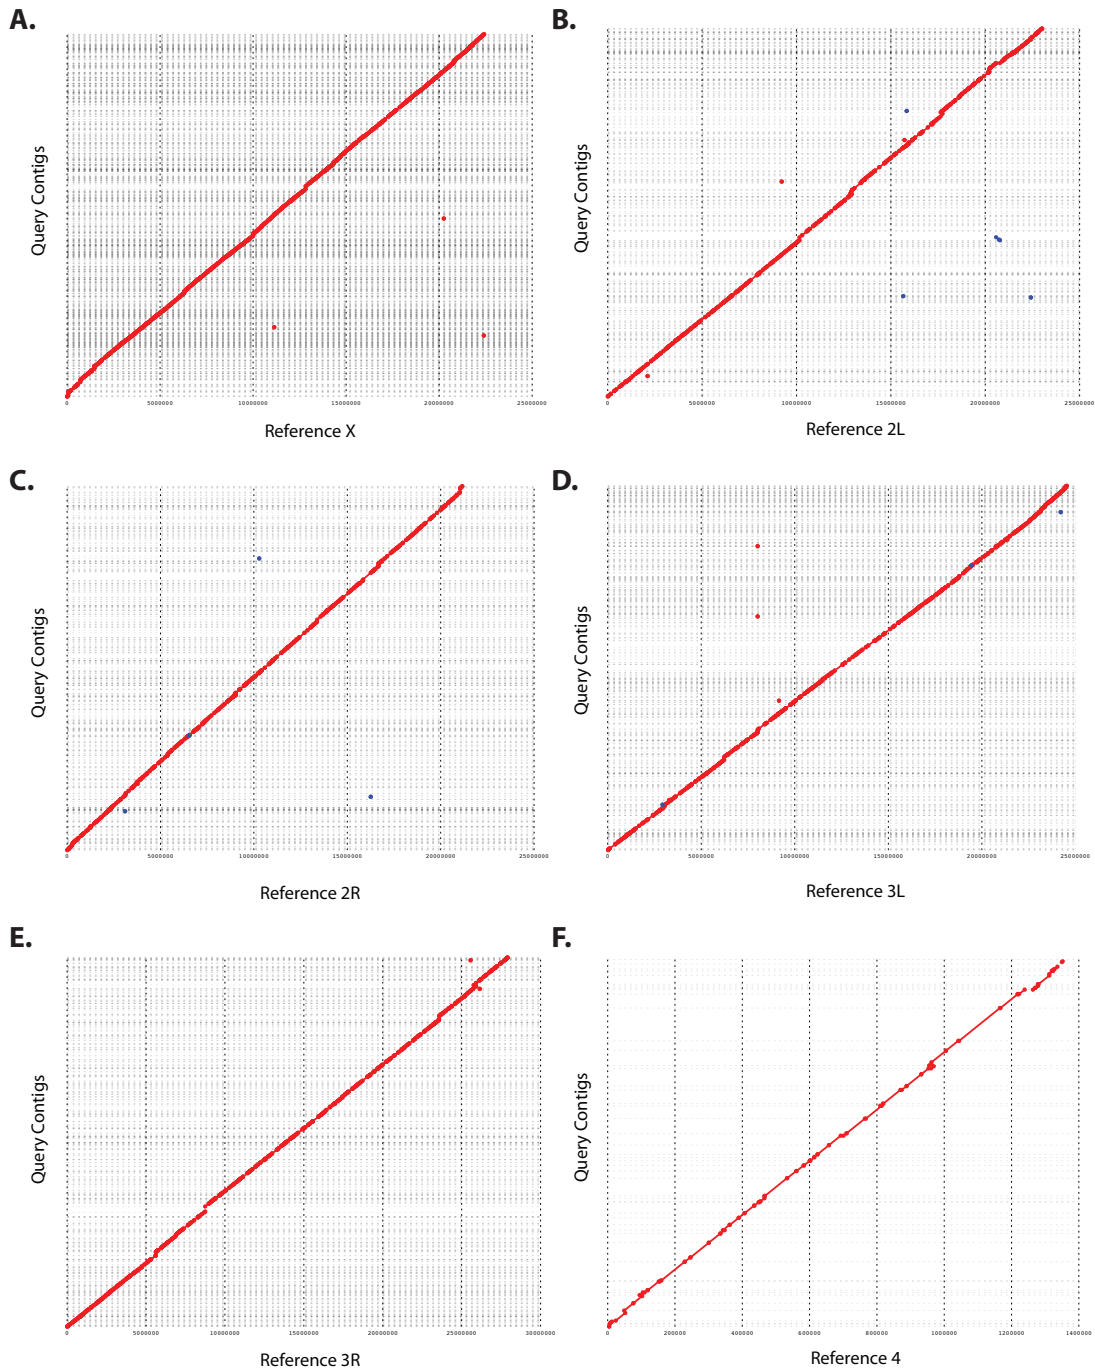

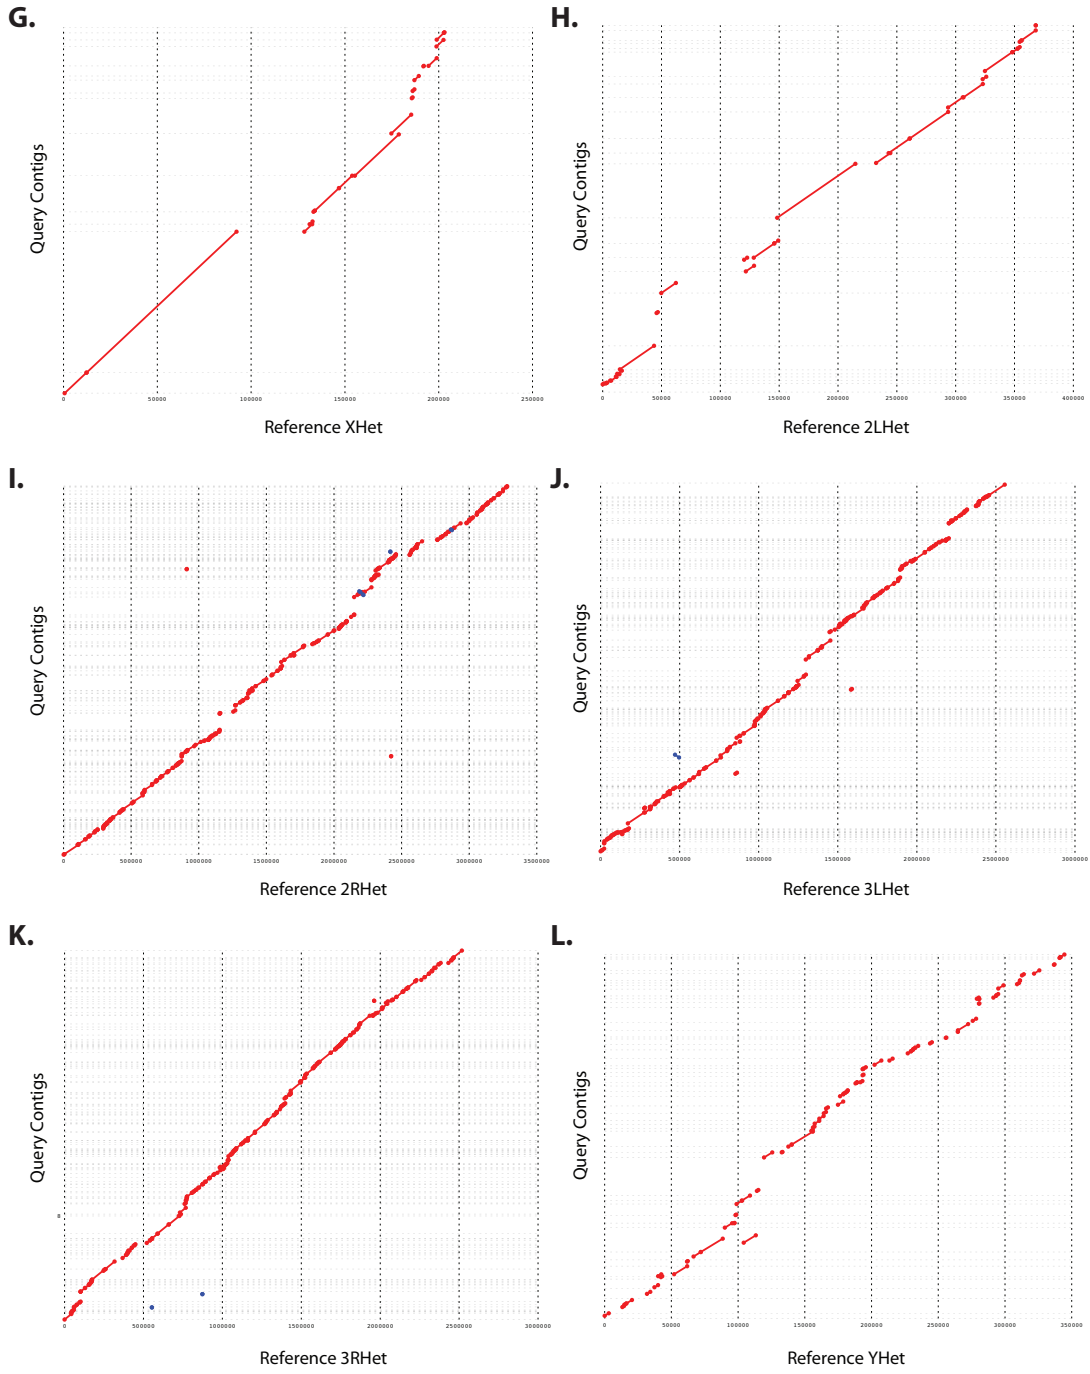

Figure 3: IGV screenshot [8] of a representative case where assembly fails due to a deficiency of long-read data derived from a long transposable element sequence. The upper-most track (blue) represents the NUCmer alignment of assembled contigs to the reference genome. The middle track represents the BWA alignment of the underlying TruSeq synthetic long-reads. For each of these tracks, blue and red shading indicate the orientation of the alignment (i.e. whether the sequence is reverse complemented). The bottom tracks (blue) indicates the boundaries of genes and transposable elements.

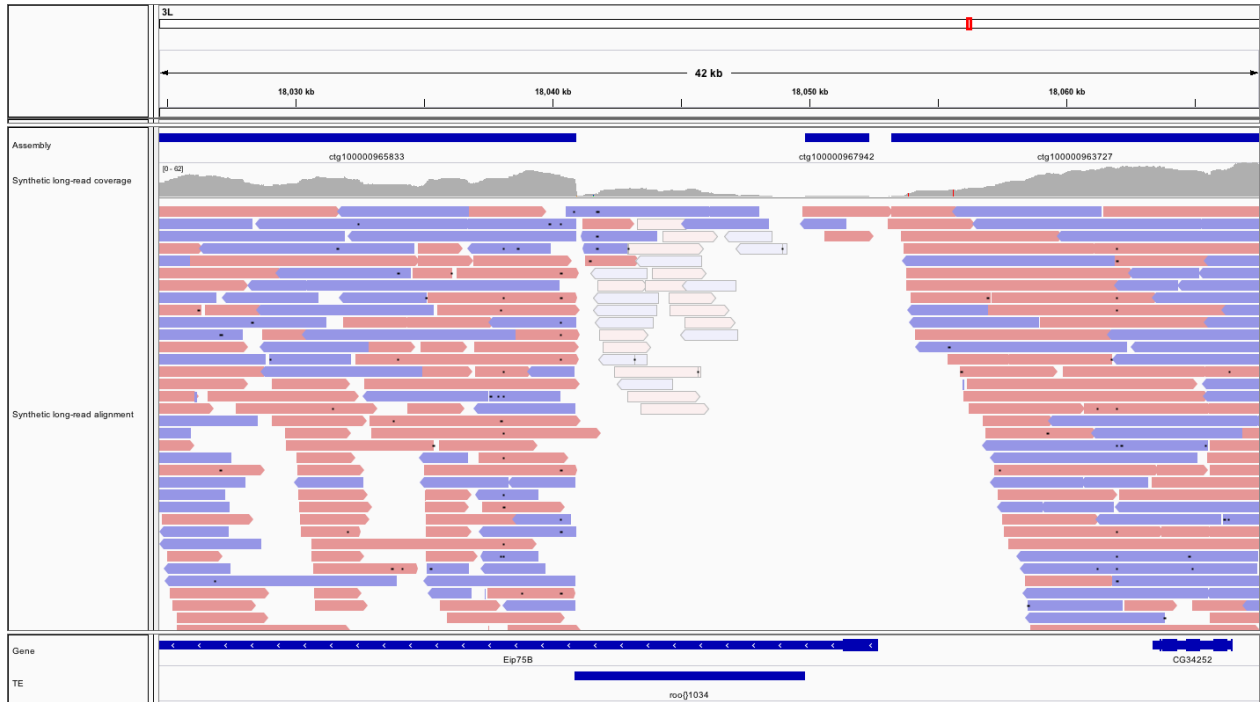

Figure 4: IGV screenshots [8] of representative cases where assembly succeeds or fails based on characteristics of TEs in the genomic region. See the legend of Figure S4 for descriptions of each of the alignment tracks. **A:** A case where assembly fails in the presence of tandem repeats of elements from the Dm88 family. **B:** A case where assembly succeeds in a repeat-dense region of chromosome arm 2R.

**A.**

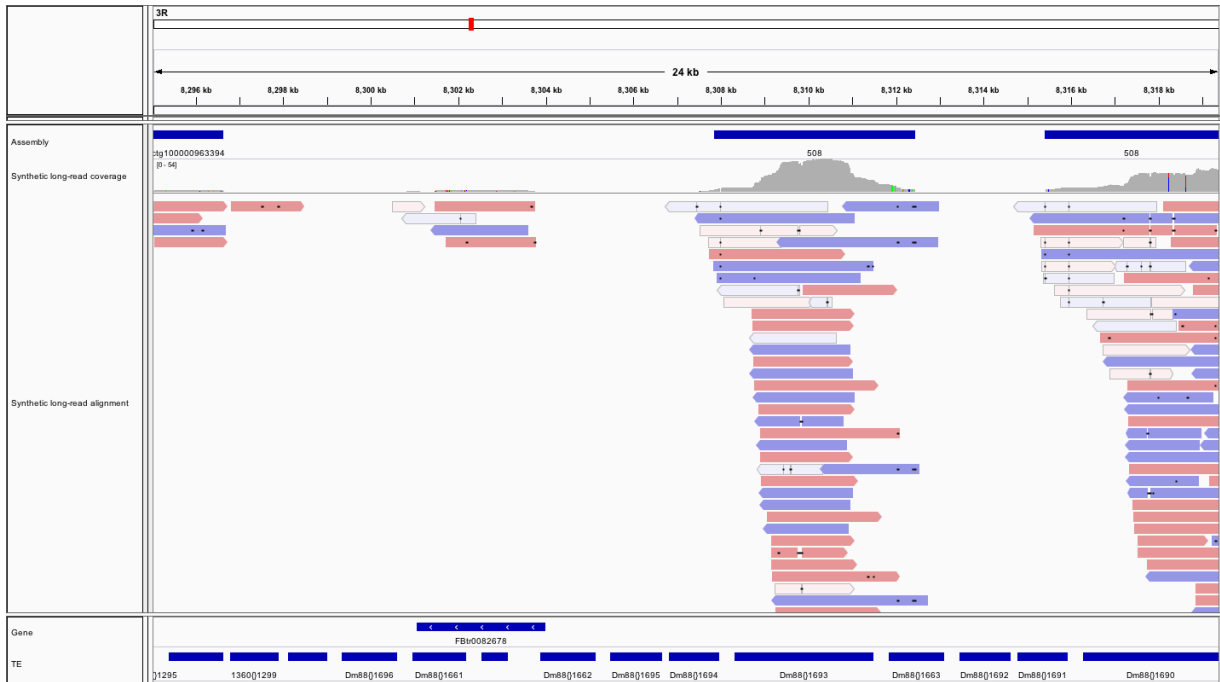

**B.**

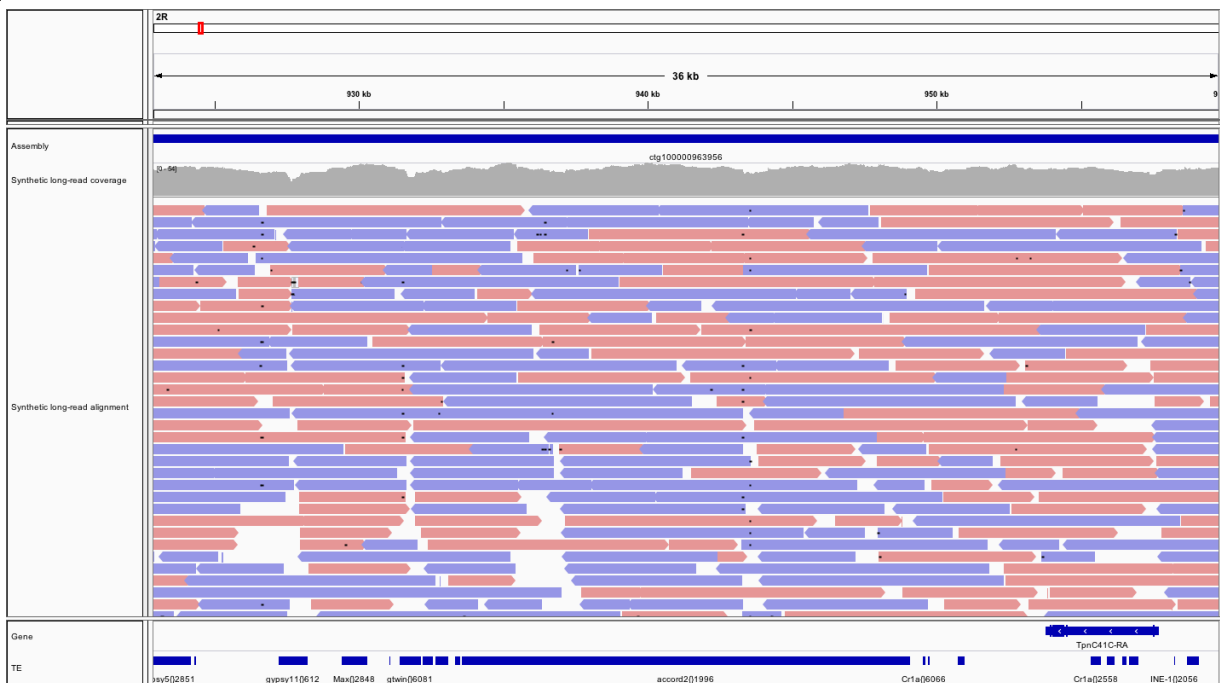

188 **Supplemental Tables**

Table S1: Number of read pairs in Illumina short read libraries (2×100 bp) and corresponding TruSeq synthetic long-read libraries (1.5-15 Kbp). In the case of mol-32-2827 and mol-32-283d, short read data from separate flow cells were combined, as indicated.

| Short read library ID       | Flow cell & lane ID | No. read pairs | TruSeq library ID | No. synthetic long-reads |
|-----------------------------|---------------------|----------------|-------------------|--------------------------|
| LP6005512-DNA_A01-LRAAAA-05 | D2672ACXX, 1        | 212463575      | mol-32-281c       | 170951                   |
| LP6005512-DNA_A01-LRAAAA-06 | D2672ACXX, 2        | 203972521      | mol-32-2827       | 240750                   |
|                             | D2B7LACXX, 7        | 82066168       |                   |                          |
| LP6005512-DNA_A01-LRAAAA-07 | D2672ACXX, 3        | 196599647      | mol-32-2832       | 174387                   |
| LP6005512-DNA_A01-LRAAAA-08 | D2672ACXX, 4        | 154537575      | mol-32-283d       | 254770                   |
|                             | D2B7LACXX, 8        | 175910619      |                   |                          |
| LP6005512-DNA_A01-LRAAAA-09 | C2A96ACXX, 3        | 174398573      | mol-32-2f5f       | 59705                    |
| LP6005512-DNA_A01-LRAAAA-10 | C2A96ACXX, 4        | 182493763      | mol-32-2f6a       | 55273                    |

Table S2: Top BLAST hits to the NCBI nucleotide database for all TruSeq synthetic long-reads. Only species/strains with  $\geq 6$  hits are reported here.

| No. long reads | Species/strain of top BLAST hit                |
|----------------|------------------------------------------------|
| 953797         | <i>Drosophila melanogaster</i>                 |
| 214            | <i>Gluconacetobacter diazotrophicus</i> PA1 5  |
| 175            | <i>Enterobacteria</i> phage HK629              |
| 163            | <i>Gluconacetobacter xylinus</i> E25           |
| 114            | <i>Gluconacetobacter xylinus</i> NBRC 3288     |
| 97             | <i>Gluconobacter oxydans</i> 621H              |
| 96             | <i>Drosophila mauritiana</i>                   |
| 83             | <i>Gluconobacter oxydans</i> H24               |
| 76             | <i>Acetobacter pasteurianus</i> 386B           |
| 58             | Cloning vector pSport1                         |
| 44             | <i>Drosophila pseudoobscura pseudoobscura</i>  |
| 30             | <i>Drosophila simulans</i>                     |
| 30             | synthetic construct                            |
| 25             | <i>Acetobacter pasteurianus</i> IFO 3283-01    |
| 14             | <i>Drosophila sechellia</i>                    |
| 10             | <i>Burkholderia lata</i>                       |
| 9              | Cloning vector placZ.attB                      |
| 8              | <i>Acetobacter aceti</i> NBRC 14818            |
| 7              | <i>Acetobacter pasteurianus</i> IFO 3283-01/12 |
| 7              | <i>Agrobacterium fabrum</i> str. C58           |
| 7              | <i>Azospirillum brasilense</i> Sp245           |
| 6              | <i>Granulibacter bethesdensis</i> CGDNIH3      |
| 6              | <i>Rhodospirillum rubrum</i> ATCC 17100        |
| 6              | <i>Zymomonas mobilis mobilis</i> ATCC 29191    |

Table S3: Family membership of TEs overlapping gaps in the alignment of the genome assembly to the high quality reference genome. Families with  $\geq 10$  overlaps are reported here.

| Family     | No. TE copies |
|------------|---------------|
| roo        | 117           |
| INE-1      | 84            |
| 1360       | 34            |
| F          | 26            |
| FB         | 21            |
| invader4   | 20            |
| 297        | 18            |
| mdg1       | 16            |
| Dm88       | 15            |
| Doc        | 15            |
| Tirant     | 14            |
| HMS-Beagle | 11            |
| opus       | 11            |
| copia      | 10            |
| invader1   | 10            |
| invader3   | 10            |

Table S4: Assembly results for all annotated transposable elements in the *D. melanogaster* genome. As in Kaminker et al. [9], we report the average length of TE copies within each family, the average divergence between each copy and the canonical sequence, and the number of elements that comprise each family. We then report the number of elements of each family entirely recovered in our assembly with perfect identity to the reference genome, as well as the number that are partially recovered, mis-assembled, or contain mismatches relative to the reference. Finally, we report the number of elements from each family that are entirely absent from the assembly (i.e., both start and end coordinates lie within alignment gaps).

| Family  | Length | Divergence | Total | Full length | Partial/Mis-assembled | Absent |
|---------|--------|------------|-------|-------------|-----------------------|--------|
| 1360    | 758    | 0.059      | 304   | 241         | 56                    | 7      |
| 17.6    | 4852   | 0.014      | 20    | 6           | 14                    | 0      |
| 1731    | 1112   | 0.109      | 13    | 10          | 3                     | 0      |
| 297     | 3906   | 0.044      | 80    | 35          | 41                    | 4      |
| 3S18    | 2816   | 0.070      | 17    | 11          | 2                     | 4      |
| 412     | 5414   | 0.036      | 37    | 11          | 25                    | 1      |
| accord  | 1976   | 0.195      | 3     | 2           | 1                     | 0      |
| accord2 | 3707   | 0.089      | 7     | 6           | 1                     | 0      |
| aurora  | 3124   | NA         | 1     | 1           | 0                     | 0      |
| baggins | 1625   | 0.027      | 35    | 29          | 4                     | 2      |
| Bari1   | 1447   | 0.019      | 6     | 6           | 0                     | 0      |
| Bari2   | 663    | 0.103      | 5     | 5           | 0                     | 0      |
| blood   | 7121   | 0.008      | 25    | 1           | 24                    | 0      |
| BS      | 1074   | 0.040      | 43    | 37          | 6                     | 0      |
| BS3     | 703    | 0.037      | 29    | 28          | 0                     | 1      |
| BS4     | 749    | NA         | 1     | 1           | 0                     | 0      |
| Burdock | 3319   | 0.050      | 22    | 10          | 12                    | 0      |
| Circe   | 2473   | 0.122      | 5     | 4           | 1                     | 0      |
| copia   | 4233   | 0.020      | 35    | 6           | 29                    | 0      |
| Cr1a    | 1597   | 0.092      | 152   | 136         | 14                    | 2      |
| diver   | 5029   | 0.039      | 11    | 1           | 9                     | 1      |
| diver2  | 1231   | 0.107      | 47    | 39          | 5                     | 3      |
| Dm88    | 1698   | 0.144      | 31    | 9           | 10                    | 12     |
| Doc     | 3386   | 0.025      | 68    | 19          | 41                    | 8      |
| Doc2    | 1688   | 0.161      | 7     | 5           | 2                     | 0      |
| Doc3    | 1229   | 0.259      | 21    | 17          | 3                     | 1      |
| Doc4    | 1925   | 0.315      | 7     | 7           | 0                     | 0      |
| F       | 3025   | 0.108      | 70    | 30          | 39                    | 1      |
| FB      | 1063   | 0.129      | 60    | 37          | 21                    | 2      |
| flea    | 3358   | 0.077      | 29    | 11          | 17                    | 1      |
| frogger | 1986   | NA         | 2     | 1           | 1                     | 0      |
| Fw2     | 1683   | 0.196      | 9     | 8           | 1                     | 0      |
| Fw3     | 423    | NA         | 7     | 6           | 1                     | 0      |
| G       | 916    | 0.227      | 17    | 12          | 5                     | 0      |
| G2      | 1051   | 0.067      | 22    | 20          | 2                     | 0      |
| G3      | 1996   | 0.095      | 7     | 6           | 1                     | 0      |
| G4      | 1212   | 0.038      | 28    | 27          | 1                     | 0      |
| G5      | 994    | 0.069      | 25    | 22          | 3                     | 0      |
| G5A     | 735    | 0.063      | 27    | 27          | 0                     | 0      |
| G6      | 1346   | 0.112      | 10    | 10          | 0                     | 0      |
| G7      | 553    | 0.048      | 4     | 4           | 0                     | 0      |
| GATE    | 2915   | 0.080      | 20    | 11          | 7                     | 2      |



Table S4 continued: Assembly results for all annotated transposable elements in the *D. melanogaster* genome. As in Kaminker et al. [9], we report the average length of TE copies within each family, the average divergence between each copy and the canonical sequence, and the number of elements that comprise each family. We then report the number of elements of each family entirely recovered in our assembly with perfect identity to the reference genome, as well as the number that are partially recovered, mis-assembled, or contain mismatches relative to the reference. Finally, we report the number of elements from each family that are entirely absent from the assembly (i.e., both start and end coordinates lie within alignment gaps).

| Family      | Length | Divergence | Total | Full length | Partial/Mis-assembled | Absent |
|-------------|--------|------------|-------|-------------|-----------------------|--------|
| gtwin       | 1559   | 0.084      | 19    | 17          | 1                     | 1      |
| gypsy       | 1514   | 0.147      | 18    | 17          | 0                     | 1      |
| gypsy2      | 2840   | 0.077      | 12    | 10          | 2                     | 0      |
| gypsy3      | 1629   | 0.126      | 15    | 13          | 2                     | 0      |
| gypsy4      | 1253   | 0.144      | 15    | 13          | 2                     | 0      |
| gypsy5      | 1879   | 0.144      | 10    | 7           | 3                     | 0      |
| gypsy6      | 1353   | 0.071      | 15    | 13          | 1                     | 1      |
| gypsy7      | 1292   | 0.126      | 4     | 4           | 0                     | 0      |
| gypsy8      | 980    | 0.103      | 57    | 54          | 1                     | 2      |
| gypsy9      | 1276   | 0.136      | 10    | 9           | 1                     | 0      |
| gypsy10     | 2886   | 0.086      | 7     | 7           | 0                     | 0      |
| gypsy11     | 1316   | 0.185      | 5     | 5           | 0                     | 0      |
| gypsy12     | 1391   | 0.103      | 50    | 45          | 4                     | 1      |
| H           | 1049   | 0.170      | 59    | 44          | 9                     | 6      |
| HB          | 1017   | 0.061      | 60    | 51          | 9                     | 0      |
| Helena      | 674    | 0.079      | 9     | 9           | 0                     | 0      |
| HeT-A       | 2436   | 0.036      | 25    | 8           | 17                    | 0      |
| HeT-Tag     | 21     | 0.012      | 23    | 1           | 22                    | 0      |
| HMS-Beagle  | 4610   | 0.043      | 23    | 7           | 14                    | 2      |
| HMS-Beagle2 | 2710   | 0.096      | 13    | 8           | 4                     | 1      |
| hopper      | 857    | 0.027      | 24    | 15          | 8                     | 1      |
| hopper2     | 1011   | 0.063      | 14    | 11          | 3                     | 0      |
| I           | 2350   | 0.113      | 38    | 24          | 8                     | 6      |
| Idefix      | 2169   | 0.114      | 17    | 12          | 5                     | 0      |
| INE-1       | 246    | 0.112      | 2235  | 2106        | 65                    | 64     |
| invader1    | 911    | 0.060      | 45    | 25          | 11                    | 9      |
| invader2    | 2196   | 0.063      | 19    | 12          | 6                     | 1      |
| invader3    | 1994   | 0.054      | 33    | 15          | 12                    | 6      |
| invader4    | 730    | 0.020      | 32    | 13          | 6                     | 13     |
| invader5    | 4175   | 0.106      | 3     | 2           | 1                     | 0      |
| invader6    | 1320   | 0.090      | 8     | 8           | 0                     | 0      |
| Ivk         | 2755   | 0.094      | 11    | 8           | 3                     | 0      |
| jockey      | 1605   | 0.040      | 96    | 76          | 16                    | 4      |
| jockey2     | 549    | 0.060      | 28    | 27          | 1                     | 0      |
| Juan        | 3272   | 0.037      | 11    | 9           | 2                     | 0      |
| looper1     | 1214   | 0.066      | 4     | 4           | 0                     | 0      |
| mariner2    | 627    | 0.064      | 23    | 22          | 1                     | 0      |
| Max         | 2393   | 0.302      | 21    | 17          | 4                     | 0      |
| McClintock  | 1781   | 0.046      | 8     | 5           | 2                     | 1      |
| mdg1        | 4894   | 0.052      | 41    | 12          | 25                    | 4      |
| mdg3        | 3254   | 0.034      | 21    | 9           | 10                    | 2      |

Table S4 continued: Assembly results for all annotated transposable elements in the *D. melanogaster* genome. As in Kaminker et al. [9], we report the average length of TE copies within each family, the average divergence between each copy and the canonical sequence, and the number of elements that comprise each family. We then report the number of elements of each family entirely recovered in our assembly with perfect identity to the reference genome, as well as the number that are partially recovered, mis-assembled, or contain mismatches relative to the reference. Finally, we report the number of elements from each family that are entirely absent from the assembly (i.e., both start and end coordinates lie within alignment gaps).

| Family          | Length | Divergence | Total | Full length | Partial/Mis-assembled | Absent |
|-----------------|--------|------------|-------|-------------|-----------------------|--------|
| micropia        | 1771   | 0.133      | 13    | 8           | 4                     | 1      |
| ninja-Dsim-like | 1390   | 0.315      | 19    | 15          | 1                     | 3      |
| NOF             | 2609   | 0.071      | 8     | 2           | 4                     | 2      |
| opus            | 4824   | 0.074      | 31    | 9           | 21                    | 1      |
| pogo            | 651    | 0.006      | 48    | 44          | 4                     | 0      |
| Porto1          | 1090   | 0.013      | 7     | 7           | 0                     | 0      |
| Q               | 124    | 0.277      | 5     | 5           | 0                     | 0      |
| Quasimodo       | 3922   | 0.089      | 29    | 16          | 12                    | 1      |
| R1-2            | 802    | NA         | 2     | 2           | 0                     | 0      |
| R1A1            | 1169   | 0.256      | 27    | 18          | 8                     | 1      |
| roo             | 7411   | 0.009      | 136   | 12          | 111                   | 13     |
| rooA            | 3654   | 0.053      | 17    | 12          | 5                     | 0      |
| rover           | 4091   | 0.041      | 7     | 4           | 3                     | 0      |
| Rt1a            | 2132   | 0.048      | 26    | 23          | 2                     | 1      |
| Rt1b            | 2945   | 0.046      | 60    | 45          | 12                    | 3      |
| Rt1c            | 1050   | 0.084      | 34    | 24          | 7                     | 3      |
| S               | 1102   | 0.471      | 65    | 48          | 16                    | 1      |
| S2              | 575    | 0.054      | 14    | 10          | 1                     | 3      |
| springer        | 2836   | 0.067      | 24    | 16          | 7                     | 1      |
| Stalker         | 2748   | 0.025      | 18    | 9           | 8                     | 1      |
| Stalker2        | 5853   | 0.043      | 16    | 7           | 9                     | 0      |
| Stalker3        | 31     | NA         | 1     | 1           | 0                     | 0      |
| Stalker4        | 2559   | 0.054      | 37    | 22          | 12                    | 3      |
| Tabor           | 2330   | 0.059      | 9     | 6           | 3                     | 0      |
| TART-A          | 2928   | 0.038      | 11    | 5           | 2                     | 4      |
| TART-B          | 258    | NA         | 3     | 2           | 1                     | 0      |
| TART-C          | 987    | NA         | 1     | 1           | 0                     | 0      |
| Tc1             | 947    | 0.039      | 26    | 25          | 1                     | 0      |
| Tc1-2           | 857    | 0.049      | 24    | 23          | 1                     | 0      |
| Tc3             | 447    | 0.096      | 19    | 17          | 2                     | 0      |
| Tirant          | 6401   | 0.084      | 25    | 4           | 18                    | 3      |
| Tom1            | 292    | 0.055      | 4     | 4           | 0                     | 0      |
| transib1        | 4581   | 0.075      | 3     | 1           | 2                     | 0      |
| transib2        | 918    | 0.029      | 24    | 19          | 4                     | 1      |
| transib3        | 1493   | 0.027      | 13    | 11          | 2                     | 0      |
| transib4        | 1946   | 0.049      | 8     | 7           | 1                     | 0      |
| Transpac        | 4394   | 0.038      | 6     | 1           | 5                     | 0      |
| X               | 1466   | 0.233      | 55    | 50          | 4                     | 1      |
| Xanthias        | 4533   | NA         | 1     | 0           | 1                     | 0      |
| Y               | NA     | NA         | 4     | 1           | 3                     | 0      |
| ZAM             | 547    | 0.508      | 4     | 4           | 0                     | 0      |

Table S5: Results of fitting a generalized linear mixed model with a binary response variable indicating whether individual TE copies are accurately assembled.

| Random effect |             | Variance | Std. Dev. |
|---------------|-------------|----------|-----------|
| Family        | (Intercept) | 1.330    | 1.153     |

  

| Fixed effect                             | Estimate | Std. Error | $z$ value | $\Pr(>  z )$           |
|------------------------------------------|----------|------------|-----------|------------------------|
| (Intercept)                              | 1.216    | 0.170      | 7.135     | $9.70 \times 10^{-13}$ |
| Length                                   | -1.633   | 0.079      | -20.766   | $< 2 \times 10^{-16}$  |
| GC content                               | 0.186    | 0.059      | 3.171     | 0.00152                |
| Divergence                               | 0.692    | 0.092      | 7.501     | $6.35 \times 10^{-14}$ |
| High identity copies                     | -0.529   | 0.180      | -2.936    | 0.00333                |
| Divergence $\times$ High identity copies | 0.382    | 0.097      | 3.921     | $8.81 \times 10^{-5}$  |

Table S6: Contig IDs for sequences with no significant hit to the NCBI nucleotide database.

| FASTA contig ID |
|-----------------|
| ctg100000966696 |
| ctg100000966814 |
| ctg100000966837 |
| ctg100000967379 |
| ctg100000967449 |
| ctg100000967457 |
| ctg100000967511 |
| ctg100000967560 |
| ctg100000967605 |
| ctg100000967626 |
| ctg100000967687 |
| ctg100000967750 |
| ctg100000967783 |
| ctg100000967784 |
| ctg100000967787 |
| ctg100000967852 |
| ctg100000967896 |
| ctg100000967928 |
| ctg100000967969 |
| ctg100000968010 |
| ctg100000968064 |
| ctg100000968094 |
| ctg100000968196 |
| ctg100000968200 |
| ctg100000968250 |
| ctg100000968272 |
| ctg100000968281 |

## References

- [1] Brown CT, Howe A, Zhang Q, Pyrkosz AB, Brom TH (2012) A reference-free algorithm for computational normalization of shotgun sequencing data. arXiv preprint arXiv:12034802 .
- [2] Simpson JT, Durbin R (2012) Efficient *de novo* assembly of large genomes using compressed data structures. *Genome Research* 22: 549–556.
- [3] Li H, Durbin R (2009) Fast and accurate short read alignment with Burrows-Wheeler transform. *Bioinformatics* 25: 1754–1760.
- [4] Altschul SF, Madden TL, Schäffer AA, Zhang J, Zhang Z, et al. (1997) Gapped BLAST and PSI-BLAST: A new generation of protein database search programs. *Nucleic Acids Research* 25: 3389–3402.
- [5] Delcher AL, Phillippy A, Carlton J, Salzberg SL (2002) Fast algorithms for large-scale genome alignment and comparison. *Nucleic Acids Research* 30: 2478–2483.
- [6] Kurtz S, Phillippy A, Delcher AL, Smoot M, Shumway M, et al. (2004) Versatile and open software for comparing large genomes. *Genome Biology* 5: R12.
- [7] Quinlan AR, Hall IM (2010) BEDTools: A flexible suite of utilities for comparing genomic features. *Bioinformatics* 26: 841–842.
- [8] Thorvaldsdóttir H, Robinson JT, Mesirov JP (2013) Integrative Genomics Viewer (IGV): High-performance genomics data visualization and exploration. *Briefings in Bioinformatics* 14: 178–192.
- [9] Kaminker JS, Bergman CM, Kronmiller B, Carlson J, Svirskas R, et al. (2002) The transposable elements of the *Drosophila melanogaster* euchromatin: a genomics perspective. *Genome Biology* 3: RESEARCH0084.
